# Supplementary material for: Prioritizing Areas for Primate Conservation in Argentina
Source: MDPI journal article supplement (doi:10.3390/d14110982), 2022-11-15
Supplement: s1 [file s1]

## **Prioritizing areas for primate conservation in Argentina**

**Ilaria Agostini <sup>1,2,\*</sup>, Santiago J. E. Velazco <sup>2,3</sup>, J. Ariel Insaurrealde <sup>2</sup>, Romina Pavé <sup>4</sup>, Ingrid Holzmann <sup>5</sup>, Eduardo Fernández-Duque <sup>6</sup>, M. Paula Tujague <sup>2,7</sup>, Silvana Peker <sup>8</sup>, Martín M. Kowalewski <sup>9</sup> and Mario S. Di Bitetti <sup>2,7</sup>**

<sup>1</sup> CENAC (Parque Nacional Nahuel Huapi-CONICET), San Carlos de Bariloche, Río Negro, Argentina. agostini.ilaria@gmail.com

<sup>2</sup> Instituto de Biología Subtropical (IBS) (CONICET-Universidad Nacional de Misiones), Puerto Iguazú, Misiones, Argentina.

<sup>3</sup> Programa de Pós-Graduação em Biodiversidade Neotropical, Universidade Federal da Integração Latino-Americana (UNILA), Foz do Iguaçu, Brazil.

<sup>4</sup> Instituto Nacional de Limnología (INALI) (CONICET-Universidad Nacional del Litoral), Santa Fe, Santa Fe, Argentina.

<sup>5</sup> Instituto de Bio y Geociencias del NOA (IBIGEO) (CONICET-Universidad Nacional de Salta), Salta, Argentina.

<sup>6</sup> Department of Anthropology and School of the Environment, Yale University, New Haven, CT, USA.

<sup>7</sup> Facultad de Ciencias Forestales, Universidad Nacional de Misiones, Eldorado, Misiones, Argentina.

<sup>8</sup> Ministerio de Ambiente y Desarrollo Sustentable de la Nación, Buenos Aires, Argentina.

<sup>9</sup> Estación Biológica de Corrientes (EBCo)-CECOAL (CONICET-Universidad Nacional del Nordeste), San Cayetano, Corrientes, Argentina.

\* Correspondence: agostini.ilaria@gmail.com; Tel.: 0054-9-3757-505475

**Figure S1.** Zonation outputs of priority areas for primates of Argentina (AICPA), from white (low priority) to black (high priority). Map based on nominal estimates from species distribution models (above) and map based on 0.3SD (standard deviation) uncertainty of models (below).

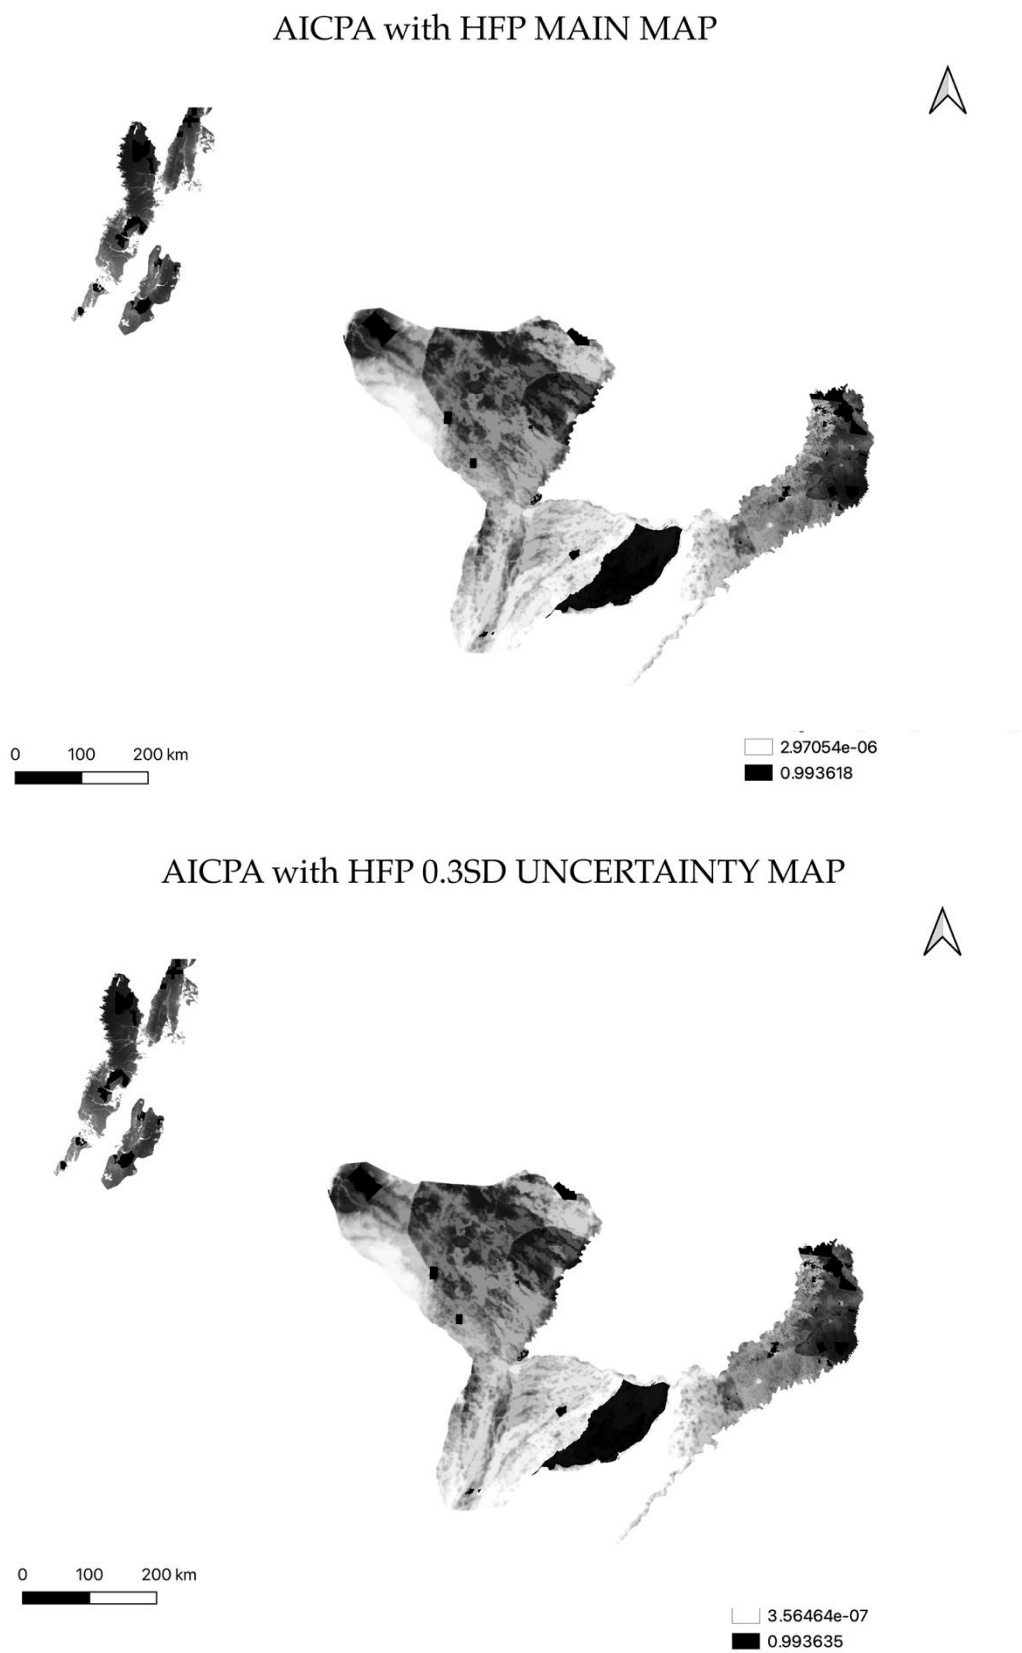

**Table S1.** List of the 13 expert primatologists (in alphabetical order of surnames) involved in reviewing the process and outputs of modeling species distribution and prioritization analysis.

| <b>Name and surname</b> | <b>Institution</b>                                                                                                              |
|-------------------------|---------------------------------------------------------------------------------------------------------------------------------|
| Ilaria Agostini         | CENAC (Parque Nacional Nahuel Huapi-CONICET), San Carlos de Bariloche, Río Negro, Argentina.                                    |
| María Celia Baldovino   | Asociación Civil Centro de Investigaciones del Bosque Atlántico (CeIBA), Puerto Iguazú, Misiones, Argentina.                    |
| Melina Brividoro        | Centro de Estudios Parasitológicos y de Vectores (CEPAVE), CONICET-Universidad Nacional de La Plata, La Plata, Argentina.       |
| Mario Di Bitetti        | Instituto de Biología Subtropical (IBS), CONICET-Universidad Nacional de Misiones, Puerto Iguazú, Misiones, Argentina.          |
| Eduardo Fernandez-Duque | Department of Anthropology and School of the Environment, Yale University, New Haven, CT, USA.                                  |
| Martín Kowalewski       | Estación Biológica de Corrientes (EBCo)-CECOAL, CONICET-Universidad Nacional del Nordeste, San Cayetano, Corrientes, Argentina. |
| Ingrid Holzmänn         | Instituto de Bio y Geociencias del NOA (IBIGEO) (CONICET-Universidad Nacional de Salta), Salta, Argentina.                      |
| Luciana Oklander        | Instituto de Biología Subtropical (IBS), CONICET-Universidad Nacional de Misiones, Posadas, Misiones, Argentina.                |
| Romina Pavé             | Instituto Nacional de Limnología (INALI), CONICET-Universidad Nacional del Litoral, Santa Fe, Santa Fe, Argentina.              |
| Silvana Peker           | Ministerio de Ambiente y Desarrollo Sustentable de la Nación, Buenos Aires, Argentina.                                          |
| Romina Pfoh             | Asociación Civil Centro de Investigaciones del Bosque Atlántico (CeIBA), Puerto Iguazú, Misiones, Argentina.                    |
| Marcelo Rotundo         | Proyecto Mirikiná y Fundación E.C.O., Formosa, Formosa, Argentina.                                                              |
| María Paula Tujague     | Instituto de Biología Subtropical (IBS), CONICET-Universidad Nacional de Misiones, Puerto Iguazú, Misiones, Argentina.          |

**Table S2.** Environmental variables used to model potential species distribution of primates in Argentina.

| <b>Variables</b>                            | <b>Unit of measurement</b> |
|---------------------------------------------|----------------------------|
| Annual mean temperature (BIO1)              | °C                         |
| Mean Diurnal Range (BIO2)                   | °C                         |
| Isothermality (BIO3)                        | °C                         |
| Temperature seasonality (BIO4)              | -                          |
| Max temperature of warmest month (BIO5)     | °C                         |
| Min temperature of coldest month (BIO6)     | °C                         |
| Temperature annual range (BIO7)             | °C                         |
| Mean temperature of wettest quarter (BIO8)  | °C                         |
| Mean temperature of driest quarter (BIO9)   | °C                         |
| Mean temperature of warmest quarter (BIO10) | °C                         |
| Mean temperature of coldest quarter (BIO11) | °C                         |
| Annual precipitation (BIO12)                | mm                         |
| Precipitation of wettest month (BIO13)      | mm                         |
| Precipitation of driest month (BIO14)       | mm                         |
| Precipitation seasonality (BIO15)           | -                          |
| Precipitation of wettest quarter (BIO16)    | mm                         |
| Precipitation of driest quarter (BIO17)     | mm                         |
| Precipitation of warmest quarter (BIO18)    | mm                         |
| Precipitation of coldest quarter (BIO19)    | mm                         |
| Distance to water bodies*                   | m                          |

\* this variable was generated.

**Table S3.** Variance and cumulative variance explained by the principal components selected from the Analysis of Principal Components performed with the environmental variables.

| <b>Principal component</b> | <b>Explained variance</b> | <b>Explained cumulative variance</b> |
|----------------------------|---------------------------|--------------------------------------|
| Comp.1                     | 0.515                     | 0.515                                |
| Comp.2                     | 0.200                     | 0.715                                |
| Comp.3                     | 0.137                     | 0.852                                |
| Comp.4                     | 0.055                     | 0.907                                |
| Comp.5                     | 0.045                     | 0.952                                |

**Table S4.** Coefficient of original bioclimatic variable regarding the first five principal components used as predictors to construct species distribution models.

| <b>Variables</b> | <b>PC 1</b> | <b>PC 2</b> | <b>PC 3</b> | <b>PC 4</b> | <b>PC 5</b> |
|------------------|-------------|-------------|-------------|-------------|-------------|
| Bio_1            | 0.294       | 0.036       | 0.236       | 0.015       | 0.043       |
| Bio_2            | -0.273      | -0.128      | 0.120       | 0.007       | -0.079      |
| Bio_3            | 0.148       | -0.318      | -0.220      | -0.116      | 0.438       |
| Bio_4            | -0.241      | 0.229       | 0.212       | -0.061      | -0.305      |
| Bio_5            | 0.244       | 0.053       | 0.370       | -0.058      | -0.158      |
| Bio_6            | 0.314       | -0.014      | 0.091       | -0.053      | 0.103       |
| Bio_7            | -0.276      | 0.075       | 0.208       | 0.031       | -0.320      |
| Bio_8            | 0.242       | 0.080       | 0.345       | 0.150       | -0.006      |
| Bio_9            | 0.303       | -0.009      | 0.114       | -0.132      | 0.091       |
| Bio_10           | 0.252       | 0.120       | 0.342       | -0.035      | -0.101      |
| Bio_11           | 0.310       | -0.041      | 0.117       | 0.000       | 0.108       |
| Bio_12           | 0.224       | 0.202       | -0.310      | 0.154       | -0.217      |
| Bio_13           | 0.249       | 0.011       | -0.293      | 0.265       | -0.292      |
| Bio_14           | -0.025      | 0.458       | -0.148      | -0.241      | 0.199       |
| Bio_15           | -0.041      | -0.467      | -0.026      | 0.133       | -0.102      |
| Bio_16           | 0.251       | 0.015       | -0.289      | 0.270       | -0.291      |
| Bio_17           | -0.019      | 0.460       | -0.154      | -0.235      | 0.200       |
| Bio_18           | -0.052      | 0.341       | -0.027      | 0.634       | 0.218       |
| Bio_19           | 0.183       | 0.010       | -0.269      | -0.484      | -0.429      |

**Table S5.** List of the variables and their relative weight used to build the human footprint raster layer that was introduced as a potential cost into the prioritization analysis. The variables and their weights were selected by experts based on current knowledge about the main anthropogenic factors affecting primates in Argentina. The road network was obtained by Open Street Maps data and included the following categories: *trunk*, *primary*, *secondary*, *tertiary*, *unclassified* and *track*. Human population density per pixel was obtained by census radius data according to the National Census of Population and Housing 2010 – INDEC. Maps of forest cover, forest plantations, agriculture and pastures were obtained by MapBiomias Chaco Colección 1 – 2017.

| N | Input variables                        | Weight |
|---|----------------------------------------|--------|
| 1 | Weighted Road network                  | 0.9    |
| 2 | Human population distributed per pixel | 0.7    |
| 3 | Pasture cover                          | 0.9    |
| 4 | Forest plantation cover                | 0.7    |
| 5 | Agriculture cover                      | 0.5    |
| 6 | Native forest cover                    | 0.3    |
